# Supplementary material for: Hospitalized Patient as Source of Aspergillus fumigatus, 2015
Source: PubMed Central journal article supplement (PMC6056103; doi:10.3201/eid2408.171865), 2018-08
Supplement: 17-1865-Techapp-s1.pdf [file 17-1865-Techapp-s1.pdf]

# Hospitalized Patient as Source of *Aspergillus fumigatus*, 2015

## Technical Appendix

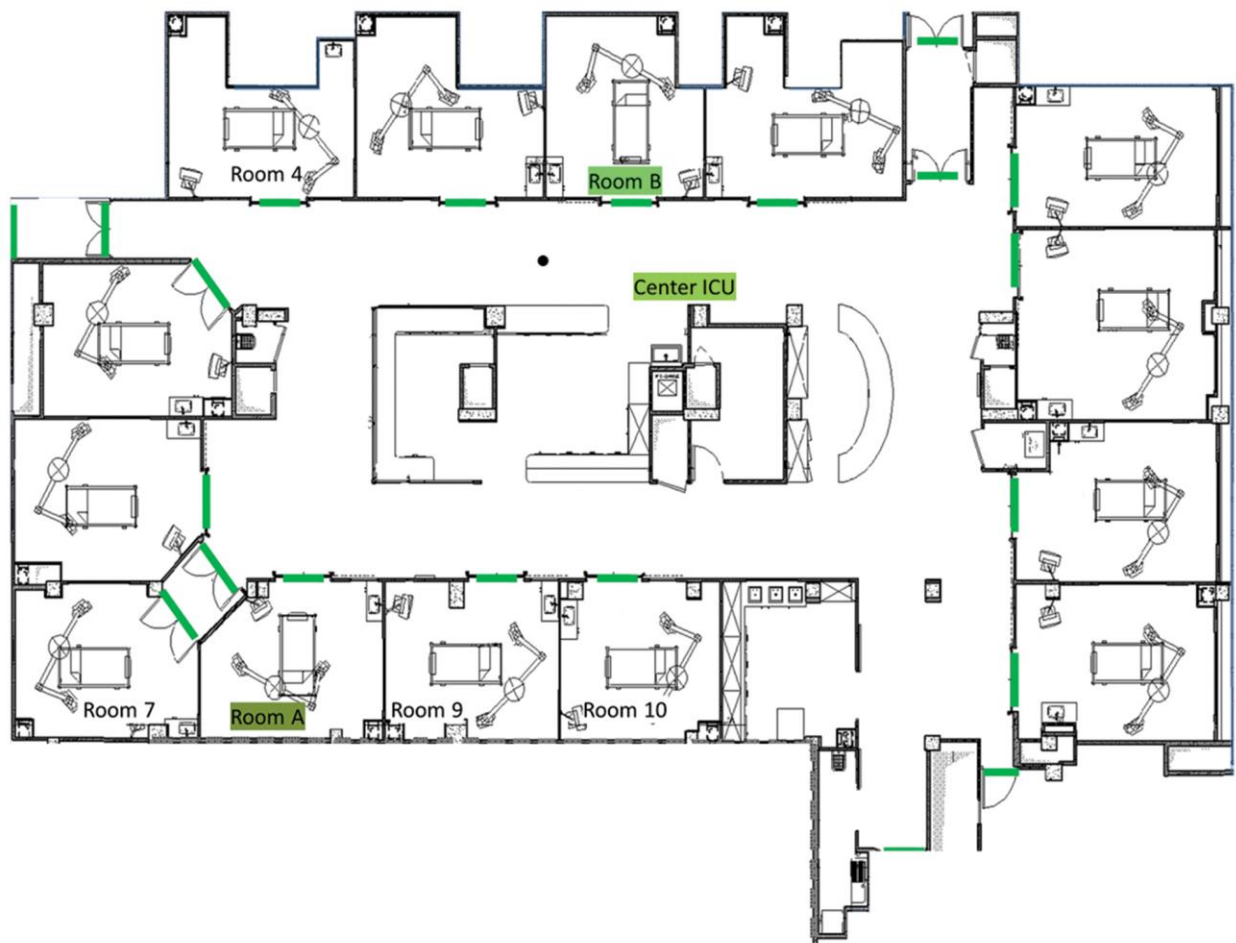

**Technical Appendix Figure.** Map of the intensive care unit, indicating the locations of rooms A and B where the patient stayed and the other rooms where *Aspergillus fumigatus* isolates were sampled and genotyped.
